# Supplementary material for: Ni-Based heterogeneous catalysts for the transformation of fatty acids into higher yields of O-free hydrocarbons
Source: Royal Society of Chemistry journal article supplement (doi:10.1039/d0gc00853b), 2020-01-01

**Figure S1.** UV-vis spectra of the impregnation solutions. Molar ratio Ni:PhN as shown in the inset.

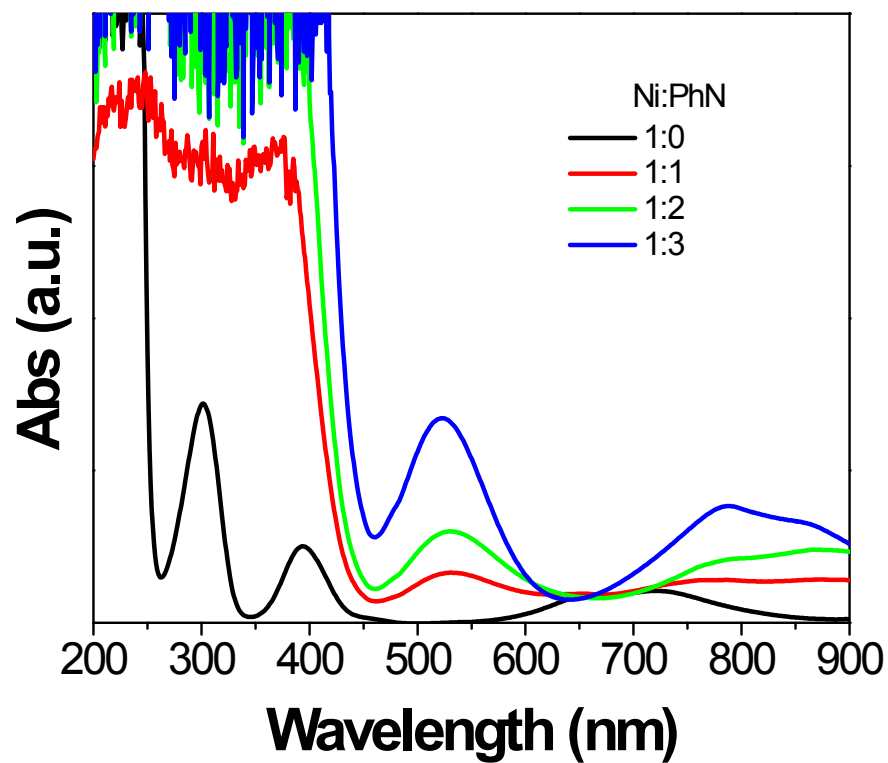

**Figure S2.** UV-Vis DRS for the Ni<sup>2+</sup> species impregnated to KIT-5. Molar ratio Ni:PhN indicated in the inset.

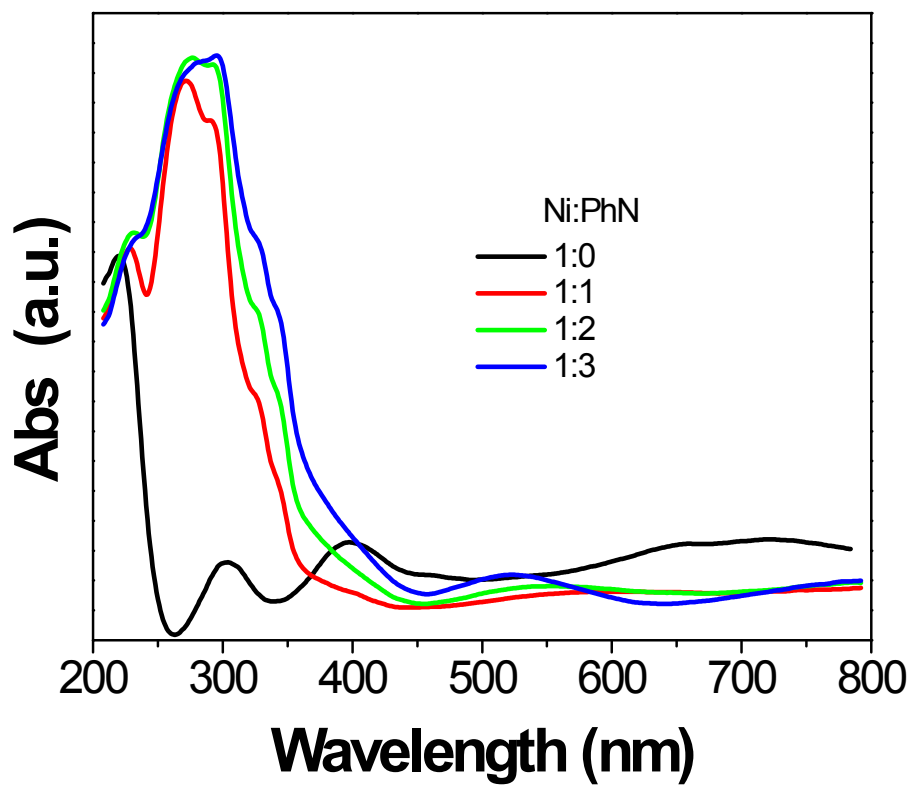

**Figure S3.** DRIFTS for the Ni supported catalysts before calcination using the complexes (a)  $[\text{Ni}(\text{H}_2\text{O})_6]^{2+}$ , (b)  $[\text{Ni}(\text{H}_2\text{O})_4(\text{PhN})]^{2+}$ , (c)  $[\text{Ni}(\text{H}_2\text{O})_2(\text{PhN})_2]^{2+}$  and (d)  $[\text{Ni}(\text{PhN})_3]^{2+}$ .

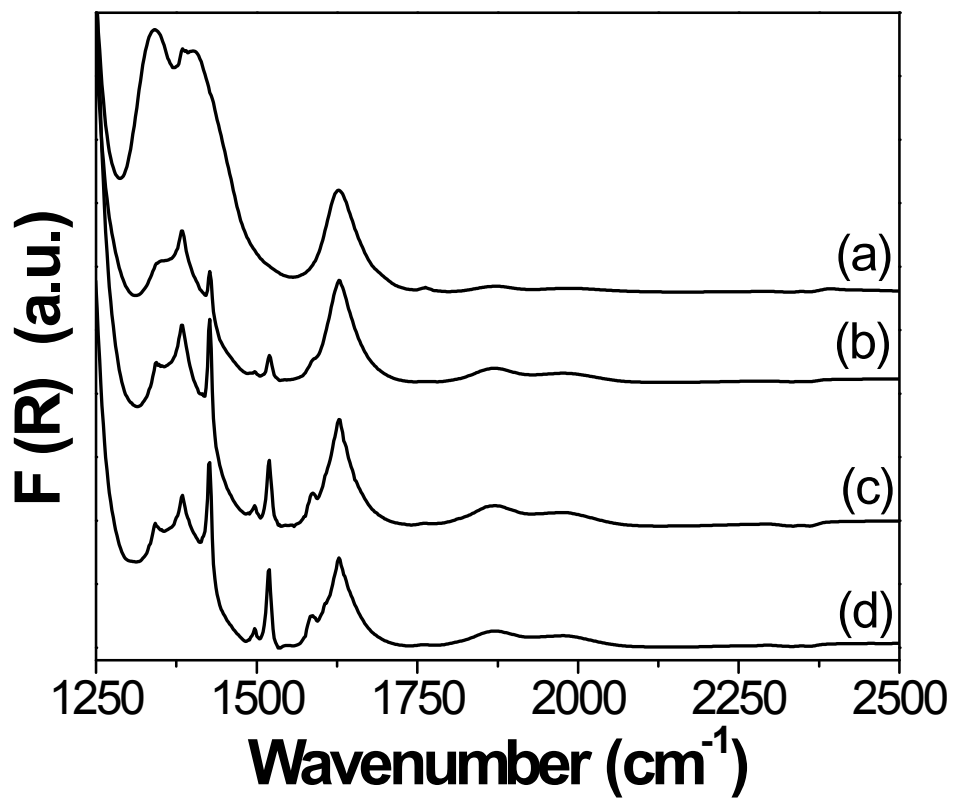

**Figure S4.** Adsorption-desorption isotherms for (○) KIT-5, (■) NiPhN0, (●) NiPhN1, (▲) NiPhN2 and (□) NiPhN3 materials.

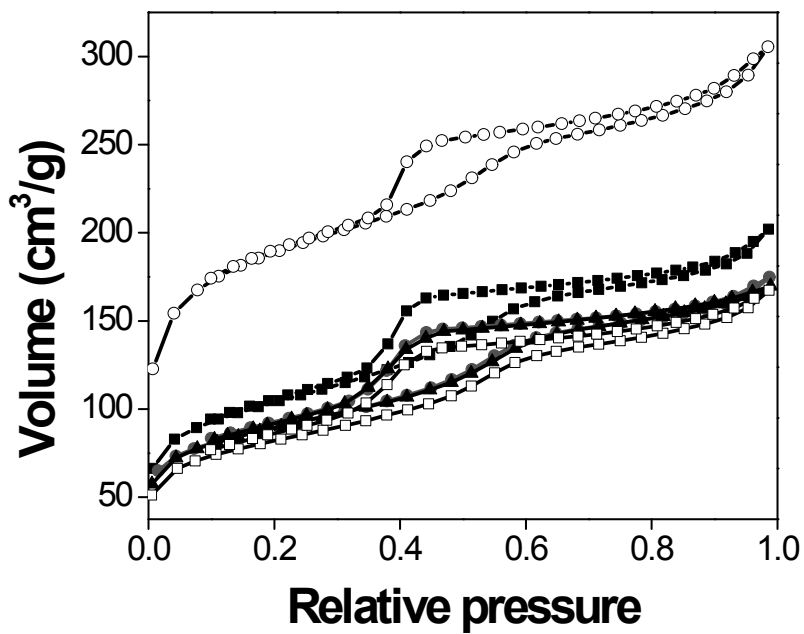

Supplement: d0gc00853b1.pdf [file d0gc00853b1.pdf]
